# Supplementary material
Source: PubMed Central journal article supplement (PMC5278709)
Supplement: AAC.01983-16_zac002175897s1.pdf [file AAC.01983-16_zac002175897s1.pdf]

**Table S1** Background information and MIC data to pleuromutilins of the 35 Hungarian *M. bovis* isolates included in the present study

| Sample ID | Origin of herd | Date | Sample source | MIC values ( $\mu\text{g/ml}$ ) |              |
|-----------|----------------|------|---------------|---------------------------------|--------------|
|           |                |      |               | Pleuromutilins                  |              |
|           |                |      |               | Tiamulin                        | Valnemulin   |
| PG45      | Connecticut    | 1961 | lung          | 0.078                           | $\leq 0.039$ |
| MYC2      | Püspökhátvan   | 2011 | lung          | 0.156                           | $\leq 0.039$ |
| MYC22     | Sümege         | 2012 | lung          | 0.312                           | $\leq 0.039$ |
| MYC30     | Bugyi          | 2012 | lung          | 0.156                           | $\leq 0.039$ |
| MYC42     | Nemti          | 2012 | lung          | 0.156                           | $\leq 0.039$ |
| MYC43     | Zsana          | 2012 | lung          | 0.312                           | $\leq 0.039$ |
| MYC44     | Györszentiván  | 2012 | lung          | 0.312                           | $\leq 0.039$ |
| MYC45     | Budapest       | 2012 | lung          | 0.312                           | $\leq 0.039$ |
| MYC46     | Budapest       | 2012 | lung          | 0.625                           | $\leq 0.039$ |
| MYC47     | Dabas          | 2012 | lung          | 0.312                           | $\leq 0.039$ |
| MYC48     | Ősi            | 2012 | nasal swab    | 0.312                           | $\leq 0.039$ |
| MYC49     | Ősi            | 2012 | nasal swab    | 0.312                           | $\leq 0.039$ |
| MYC50     | Ősi            | 2012 | lung          | 0.312                           | $\leq 0.039$ |
| MYC51     | Ősi            | 2012 | nasal swab    | 0.156                           | $\leq 0.039$ |
| MYC52     | Solt           | 2012 | lung          | 0.078                           | $\leq 0.039$ |
| MYC53     | Solt           | 2012 | lung          | 0.156                           | $\leq 0.039$ |
| MYC65     | Csengersima    | 2012 | nasal swab    | 0.039                           | $\leq 0.039$ |
| MYC66     | Csengersima    | 2012 | nasal swab    | 0.156                           | $\leq 0.039$ |
| MYC67     | Csengersima    | 2012 | lung          | 0.625                           | $\leq 0.039$ |
| MYC68     | Csengersima    | 2012 | lung          | 0.039                           | $\leq 0.039$ |
| MYC69     | Komárom        | 2013 | nasal swab    | 0.156                           | $\leq 0.039$ |
| MYC70     | Komárom        | 2013 | nasal swab    | 0.156                           | $\leq 0.039$ |
| MYC71     | Komárom        | 2013 | nasal swab    | 0.078                           | $\leq 0.039$ |
| MYC72     | Komárom        | 2013 | nasal swab    | 0.078                           | $\leq 0.039$ |
| MYC73     | Komárom        | 2013 | nasal swab    | 0.078                           | $\leq 0.039$ |
| MYC74     | Komárom        | 2013 | nasal swab    | 0.156                           | $\leq 0.039$ |
| MYC75     | Komárom        | 2013 | nasal swab    | 0.156                           | $\leq 0.039$ |
| MYC76     | Komárom        | 2013 | nasal swab    | 0.312                           | $\leq 0.039$ |
| MYC77     | Kertészsziget  | 2010 | lung          | 0.312                           | $\leq 0.039$ |
| MYC78     | Hosszúpályi    | 2011 | lung          | 0.312                           | $\leq 0.039$ |
| MYC79     | Hosszúpályi    | 2011 | lung          | 0.312                           | $\leq 0.039$ |
| MYC80     | Ebes           | 2011 | lymph node    | 0.312                           | $\leq 0.039$ |
| MYC81     | Felsőnyárad    | 2013 | lung          | 0.312                           | $\leq 0.039$ |
| MYC82     | Felsőnyárad    | 2013 | nasal swab    | 0.156                           | $\leq 0.039$ |
| MYC83     | Alsótold       | 2013 | lung          | 0.156                           | $\leq 0.039$ |
| MYC84     | Felsőnyárad    | 2013 | nasal swab    | 0.156                           | $\leq 0.039$ |

**Table S2** Susceptibility to the 12 examined antibiotics of *M. bovis* strains before and after selection

| Drug used for selection | Strain | Initial MIC (µg/ml) | No. of passages | MIC values (µg/ml) |              |               |                |                 |               |            |            |             |            |             |            |                |  |
|-------------------------|--------|---------------------|-----------------|--------------------|--------------|---------------|----------------|-----------------|---------------|------------|------------|-------------|------------|-------------|------------|----------------|--|
|                         |        |                     |                 | Fluoroquinolones   |              |               | Aminocyclitols |                 | Tetracyclines |            | Macrolides |             | Phenicol   | Lincosamide |            | Pleuromutilins |  |
|                         |        |                     |                 | Danofloxacin       | Enrofloxacin | Marbofloxacin | Spectinomycin  | Oxytetracycline | Tetracycline  | Tilmicosin | Tylosin    | Florfenicol | Lincomycin | Tiamulin    | Valnemulin |                |  |
| Danofloxacin            | MYC52  | 0.156               | 10              | >10                | >10          | >10           | 8              | 2               | 0.5           | ≤0.5       | ≤0.5       | 4           | 1          | 0.078       | ≤0.039     |                |  |
|                         | MYC53  | 0.156               | 9               | >10                | >10          | >10           | 4              | 1               | ≤0.25         | ≤0.5       | ≤0.5       | 4           | ≤0.25      | 0.039       | ≤0.039     |                |  |
|                         | PG45   | 0.156               | 7               | >10                | >10          | >10           | 4              | 2               | 0.5           | ≤0.5       | ≤0.5       | 4           | 0.5        | 0.078       | ≤0.039     |                |  |
| Enrofloxacin            | MYC52  | 0.156               | 4               | >10                | >10          | >10           | 8              | 2               | 0.5           | ≤0.5       | ≤0.5       | 4           | 1          | 0.078       | ≤0.039     |                |  |
|                         | MYC53  | 0.156               | 8               | >10                | >10          | >10           | 8              | 2               | 0.5           | ≤0.5       | ≤0.5       | 4           | 1          | 0.078       | ≤0.039     |                |  |
|                         | PG45   | 0.156               | 6               | >10                | >10          | >10           | 8              | 2               | 0.5           | ≤0.5       | ≤0.5       | 2           | 0.5        | 0.039       | ≤0.039     |                |  |
| Marbofloxacin           | MYC52  | 0.312               | 5               | >10                | >10          | >10           | 8              | 2               | 0.5           | ≤0.5       | ≤0.5       | 4           | 1          | 0.156       | ≤0.039     |                |  |
|                         | MYC53  | 0.625               | 5               | >10                | >10          | >10           | 8              | 2               | 0.5           | ≤0.5       | ≤0.5       | 4           | 1          | 0.078       | ≤0.039     |                |  |
|                         | PG45   | 0.625               | 7               | >10                | >10          | >10           | 8              | 4               | 0.5           | ≤0.5       | ≤0.5       | 2           | 0.5        | 0.039       | ≤0.039     |                |  |
| Spectinomycin           | MYC52  | 4                   | 2               | 0.156              | 0.156        | 0.625         | >256           | 4               | 1             | ≤0.5       | ≤0.5       | 4           | 0.5        | 0.156       | ≤0.039     |                |  |
|                         | MYC53  | 4                   | 2               | 0.156              | 0.156        | 0.625         | >256           | 4               | 1             | ≤0.5       | ≤0.5       | 4           | 1          | 0.156       | ≤0.039     |                |  |
|                         | PG45   | 4                   | 3               | 0.156              | 0.156        | 0.312         | >256           | 4               | 1             | ≤0.5       | ≤0.5       | 2           | 0.5        | 0.039       | ≤0.039     |                |  |
| Oxytetracycline         | MYC52  | 2                   | 9               | 0.156              | 0.156        | 0.625         | 8              | >64             | >64           | ≤0.5       | ≤0.5       | 2           | ≤0.25      | ≤0.039      | ≤0.039     |                |  |
|                         | MYC53  | 2                   | 10              | 0.156              | 0.156        | 0.625         | 8              | >64             | >64           | ≤0.5       | ≤0.5       | 2           | ≤0.25      | 0.039       | ≤0.039     |                |  |
|                         | PG45   | 2                   | 15              | 0.312              | 0.312        | 0.625         | 8              | 32              | 8             | 1          | ≤0.5       | 4           | 1          | 0.078       | ≤0.039     |                |  |
| Tetracycline            | MYC52  | ≤0.25               | 13              | 0.156              | 0.156        | 0.312         | 16             | >64             | >64           | ≤0.5       | ≤0.5       | 4           | 1          | 0.156       | ≤0.039     |                |  |
|                         | MYC53  | ≤0.25               | 13              | 0.156              | 0.156        | 0.625         | 16             | >64             | >64           | ≤0.5       | ≤0.5       | 2           | 0.5        | 0.039       | ≤0.039     |                |  |
|                         | PG45   | ≤0.25               | 18              | 0.156              | 0.156        | 0.625         | 16             | >64             | 32            | ≤0.5       | ≤0.5       | 4           | 1          | 0.078       | ≤0.039     |                |  |
| Tilmicosin              | MYC52  | ≤0.5                | 5               | 0.156              | 0.156        | 0.625         | 4              | 2               | 0.5           | >128       | >128       | 8           | >64        | 0.625       | ≤0.039     |                |  |
|                         | MYC53  | ≤0.5                | 2               | 0.156              | 0.156        | 0.625         | 8              | 2               | 0.5           | >128       | >128       | 8           | >64        | 1.25        | ≤0.039     |                |  |
|                         | PG45   | ≤0.5                | 3               | 0.156              | 0.156        | 0.625         | 8              | 4               | 1             | >128       | 64         | 8           | 1          | 0.078       | ≤0.039     |                |  |
| Tylosin                 | MYC52  | ≤0.5                | 6               | 0.156              | 0.156        | 0.625         | 4              | 2               | 0.5           | >128       | >128       | 4           | 1          | 0.312       | ≤0.039     |                |  |
|                         | MYC53  | ≤0.5                | 3               | 0.156              | 0.156        | 0.625         | 8              | 2               | 0.5           | >128       | >128       | >32         | 2          | 0.312       | ≤0.039     |                |  |
|                         | PG45   | ≤0.5                | 6               | 0.156              | 0.156        | 0.625         | 4              | 4               | 1             | 64         | >128       | >32         | 1          | 0.156       | ≤0.039     |                |  |
| Lincomycin              | MYC52  | ≤0.5                | 4               | 0.156              | 0.156        | 0.312         | 4              | 2               | ≤0.25         | >128       | >128       | 8           | >64        | 1.25        | ≤0.039     |                |  |
|                         | MYC53  | 1                   | 2               | 0.156              | 0.156        | 0.625         | 8              | 2               | 0.5           | >128       | >128       | 8           | >64        | 5           | 0.039      |                |  |
|                         | PG45   | 1                   | 5               | 0.156              | 0.156        | 0.312         | 4              | 2               | 0.5           | >128       | 16         | 4           | 16         | 0.625       | ≤0.039     |                |  |
| Florfenicol             | MYC52  | 4                   | 2               | 0.156              | 0.156        | 0.312         | 4              | 1               | ≤0.25         | 8          | 2          | >32         | 8          | >10         | >10        |                |  |
|                         | MYC53  | 4                   | 2               | 0.156              | 0.156        | 0.312         | 4              | 1               | ≤0.25         | 8          | 4          | >32         | 8          | 0.625       | 0.039      |                |  |
|                         | PG45   | 4                   | 5               | 0.156              | 0.312        | 0.625         | 4              | 4               | ≤0.25         | 16         | >128       | >32         | 2          | 0.156       | ≤0.039     |                |  |
| Tiamulin                | MYC52  | 0.078               | 2               | 0.156              | 0.156        | 0.625         | 4              | 2               | ≤0.25         | 1          | ≤0.5       | >32         | 4          | >10         | >10        |                |  |
|                         | MYC53  | 0.156               | 2               | 0.156              | 0.156        | 0.312         | 4              | 1               | ≤0.25         | 1          | 1          | >32         | 4          | >10         | 0.156      |                |  |
|                         | PG45   | 0.078               | 3               | 0.156              | 0.156        | 0.625         | 4              | 4               | ≤0.25         | 32         | 1          | >32         | 16         | >10         | >10        |                |  |
| Valnemulin              | MYC52  | ≤0.039              | 14              | 0.156              | 0.312        | 0.625         | 8              | 4               | 1             | 4          | 8          | >32         | 1          | >10         | 0.078      |                |  |
|                         | MYC53  | ≤0.039              | 10              | 0.156              | 0.156        | 0.625         | 8              | 1               | ≤0.25         | >128       | >128       | 16          | >64        | >10         | >10        |                |  |
|                         | PG45   | ≤0.039              | 3               | 0.156              | 0.156        | 0.625         | 4              | 2               | 0.5           | 64         | ≤0.5       | >32         | 16         | >10         | >10        |                |  |
